# Supplementary material for: Particle Size Effect of Cyetpyrafen Formulation in the Pesticide Transmission Process and Its Impact on Biological Activity
Source: MDPI journal article supplement (doi:10.3390/molecules28217432), 2023-11-05
Supplement: s1 [file s1]

# Supplementary Material

## **Particle Size Effect of Cyetpyrafen Formulation in the Pesticide Transmission Process and Its Impact on Biological Activity**

Lu Yu<sup>1,2</sup>, He Liu<sup>1</sup>, Miao Yu<sup>1</sup>, Qi Zhang<sup>1,\*</sup>, Jingyu Chou<sup>2,\*</sup>, Yuanhua Wu<sup>1,\*</sup>

*<sup>1</sup>Plant Protection college, Shenyang Agricultural University, Shenyang 110866, China*

*<sup>2</sup>Shenyang Sinochem Agrochemicals R&D Co. Ltd, State Laboratory of the Discovery and Development of Novel Pesticide, Shenyang 110021, China*

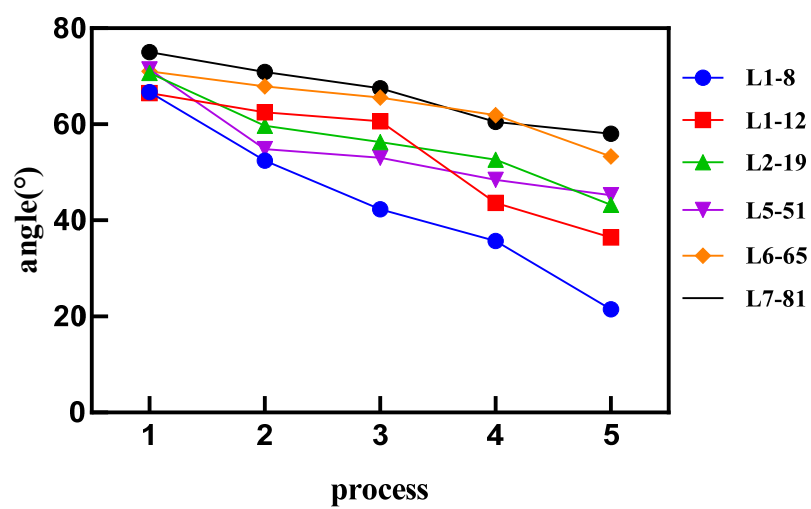

Figure S1. Contact angle value within 10 seconds

|                                                                                                                                                                                                                                                                                                                                                                                                                                                                                                                                                                                                                                                                                                                                                                                                                                                                                                                                                                                                                     |                                                                                                                                                                                                                                                                                                                                                                                                                                                                                                                                                                                                                                                                                                                                                                                                                                                                                                                                                         |                                                                                                                                                                                                                                                                                                                                                                                                                                                                                                                                                                                                                                                                                                                                                                                                                                                                                                                                                                                                                                                                                                           |
|---------------------------------------------------------------------------------------------------------------------------------------------------------------------------------------------------------------------------------------------------------------------------------------------------------------------------------------------------------------------------------------------------------------------------------------------------------------------------------------------------------------------------------------------------------------------------------------------------------------------------------------------------------------------------------------------------------------------------------------------------------------------------------------------------------------------------------------------------------------------------------------------------------------------------------------------------------------------------------------------------------------------|---------------------------------------------------------------------------------------------------------------------------------------------------------------------------------------------------------------------------------------------------------------------------------------------------------------------------------------------------------------------------------------------------------------------------------------------------------------------------------------------------------------------------------------------------------------------------------------------------------------------------------------------------------------------------------------------------------------------------------------------------------------------------------------------------------------------------------------------------------------------------------------------------------------------------------------------------------|-----------------------------------------------------------------------------------------------------------------------------------------------------------------------------------------------------------------------------------------------------------------------------------------------------------------------------------------------------------------------------------------------------------------------------------------------------------------------------------------------------------------------------------------------------------------------------------------------------------------------------------------------------------------------------------------------------------------------------------------------------------------------------------------------------------------------------------------------------------------------------------------------------------------------------------------------------------------------------------------------------------------------------------------------------------------------------------------------------------|
| <p><b>Equation Group</b></p> <ul style="list-style-type: none"> <li>Add discrete amounts of Imidacloprid in ml to Library 1 (A1:C4) in ml</li> <li>Add discrete amounts of S200 in ml to Library 1 (A1:C4) in ml</li> <li>Add discrete amounts of SK-20TX in ml to Library 1 (A1:C4) in ml</li> <li>Add discrete amounts of SK-560EP in ml to Library 1 (A1-B4) in ml</li> <li>Add discrete amounts of YUS-CH7000 in ml to Library 1 (A1)(B1-C4) in ml</li> <li>Add discrete amounts of water in ml to Library 1 (A1:C4) in ml</li> <li>Add discrete amounts of Greenmul 5810 in ml to Library 1 (A2)(B4) in ml</li> <li>Add discrete amounts of Atlas G-1086 in ml to Library 1 (A3)(C1) in ml</li> <li>Add discrete amounts of Emulsogen EL 360 in ml to Library 1 (A4)(C2) in ml</li> <li>Add discrete amounts of AEO-3 in ml to Library 1 (B1)(C3) in ml</li> <li>Add discrete amounts of 500# in ml to Library 1 (B2)(C4) in ml</li> <li>Add discrete amounts of 600# in ml to Library 1 (B3) in ml</li> </ul> | <p><b>Equation Group</b></p> <ul style="list-style-type: none"> <li>Add discrete amounts of Imidacloprid in ml to Library 2 (A1:C4) in ml</li> <li>Add discrete amounts of S200 in ml to Library 2 (A1:C4) in ml</li> <li>Add discrete amounts of SK-20TX in ml to Library 2 (A1:C4) in ml</li> <li>Add discrete amounts of YUS-CH7000 in ml to Library 2 (A1) in ml</li> <li>Add discrete amounts of 600# in ml to Library 2 (A1)(B2-C2) in ml</li> <li>Add discrete amounts of water in ml to Library 2 (A1:C4) in ml</li> <li>Add discrete amounts of Greenmul 5810 in ml to Library 2 (A1-B4) in ml</li> <li>Add discrete amounts of Atlas G-1086 in ml to Library 2 (A2)(B3-B4)(C1-C2) in ml</li> <li>Add discrete amounts of Emulsogen EL 360 in ml to Library 2 (A3-C4) in ml</li> <li>Add discrete amounts of AEO-3 in ml to Library 2 (A4-B4)(C3) in ml</li> <li>Add discrete amounts of 500# in ml to Library 2 (B1-C1)(C4) in ml</li> </ul>  | <p><b>Equation Group</b></p> <ul style="list-style-type: none"> <li>Add discrete amounts of Imidacloprid in ml to Library 3 (A1:C4) in ml</li> <li>Add discrete amounts of S200 in ml to Library 3 (A1:C4) in ml</li> <li>Add discrete amounts of SK-20TX in ml to Library 3 (A1-A4) in ml</li> <li>Add discrete amounts of Emulsogen EL 360 in ml to Library 3 (A1)(B3)(C4) in ml</li> <li>Add discrete amounts of 600# in ml to Library 3 (A1)(A3) in ml</li> <li>Add discrete amounts of water in ml to Library 3 (A1-C4) in ml</li> <li>Add discrete amounts of AEO-3 in ml to Library 3 (A2-A3)(B4) in ml</li> <li>Add discrete amounts of 500# in ml to Library 3 (A2)(A4)(C1) in ml</li> <li>Add discrete amounts of 600# in ml to Library 3 (A4)(C2) in ml</li> <li>Add discrete amounts of SK-560EP in ml to Library 3 (B1-C4) in ml</li> <li>Add discrete amounts of YUS-CH7000 in ml to Library 3 (B1-C4) in ml</li> <li>Add discrete amounts of Greenmul 5810 in ml to Library 3 (B1)(C3-C4) in ml</li> <li>Add discrete amounts of Atlas G-1086 in ml to Library 3 (B2)(C3) in ml</li> </ul> |
| <p><b>Equation Group</b></p> <ul style="list-style-type: none"> <li>Add discrete amounts of Imidacloprid in ml to Library 4 (A1:C4) in ml</li> <li>Add discrete amounts of S200 in ml to Library 4 (A1:C4) in ml</li> <li>Add discrete amounts of SK-560EP in ml to Library 4 (A1:C4) in ml</li> <li>Add discrete amounts of Greenmul 5810 in ml to Library 4 (A1-A3) in ml</li> <li>Add discrete amounts of AEO-3 in ml to Library 4 (A1-B1)(B3-C4) in ml</li> <li>Add discrete amounts of water in ml to Library 4 (A1:C4) in ml</li> <li>Add discrete amounts of 500# in ml to Library 4 (A2-B2)(C1)(C3) in ml</li> <li>Add discrete amounts of 600# in ml to Library 4 (A3-B3)(C2)(C4) in ml</li> <li>Add discrete amounts of Atlas G-1086 in ml to Library 4 (A4)(B1-B3) in ml</li> <li>Add discrete amounts of Emulsogen EL 360 in ml to Library 4 (A4-B4)(C1-C2) in ml</li> </ul>                                                                                                                            | <p><b>Equation Group</b></p> <ul style="list-style-type: none"> <li>Add discrete amounts of Imidacloprid in ml to Library 5 (A1:C4) in ml</li> <li>Add discrete amounts of S200 in ml to Library 5 (A1:C4) in ml</li> <li>Add discrete amounts of SK-560EP in ml to Library 5 (A1) in ml</li> <li>Add discrete amounts of 500# in ml to Library 5 (A1)(C1-C4) in ml</li> <li>Add discrete amounts of 600# in ml to Library 5 (A1)(B2-C2) in ml</li> <li>Add discrete amounts of water in ml to Library 5 (A1:C4) in ml</li> <li>Add discrete amounts of YUS-CH7000 in ml to Library 5 (A1-C4) in ml</li> <li>Add discrete amounts of Greenmul 5810 in ml to Library 5 (A1-B4) in ml</li> <li>Add discrete amounts of Atlas G-1086 in ml to Library 5 (A2)(B3-B4)(C1-C2) in ml</li> <li>Add discrete amounts of Emulsogen EL 360 in ml to Library 5 (A3-C4) in ml</li> <li>Add discrete amounts of AEO-3 in ml to Library 5 (A4-B4)(C3) in ml</li> </ul> |                                                                                                                                                                                                                                                                                                                                                                                                                                                                                                                                                                                                                                                                                                                                                                                                                                                                                                                                                                                                                                                                                                           |
| <p><b>Equation Group</b></p> <ul style="list-style-type: none"> <li>Add discrete amounts of Imidacloprid in ml to Library 6 (A1:C4) in ml</li> <li>Add discrete amounts of S200 in ml to Library 6 (A1:C4) in ml</li> <li>Add discrete amounts of YUS-CH7000 in ml to Library 6 (A1-A4) in ml</li> <li>Add discrete amounts of Emulsogen EL 360 in ml to Library 6 (A1-C3) in ml</li> <li>Add discrete amounts of 600# in ml to Library 6 (A1)(A3-B4)(C3) in ml</li> <li>Add discrete amounts of water in ml to Library 6 (A1:C4) in ml</li> <li>Add discrete amounts of AEO-3 in ml to Library 6 (A2-B3)(C1)(C4) in ml</li> <li>Add discrete amounts of 500# in ml to Library 6 (A2)-(C4) in ml</li> <li>Add discrete amounts of Greenmul 5810 in ml to Library 6 (B1-C4) in ml</li> <li>Add discrete amounts of Atlas G-1086 in ml to Library 6 (B1-B4) in ml</li> </ul>                                                                                                                                          | <p><b>Equation Group</b></p> <ul style="list-style-type: none"> <li>Add discrete amounts of Imidacloprid in ml to Library 7 (A1:C4) in ml</li> <li>Add discrete amounts of S200 in ml to Library 7 (A1:C4) in ml</li> <li>Add discrete amounts of Greenmul 5810 in ml to Library 7 (A1-A2) in ml</li> <li>Add discrete amounts of AEO-3 in ml to Library 7 (A1)(A1-C3)(C4) in ml</li> <li>Add discrete amounts of 600# in ml to Library 7 (A1-B2)(B2-C4) in ml</li> <li>Add discrete amounts of water in ml to Library 7 (A1:C4) in ml</li> <li>Add discrete amounts of 500# in ml to Library 7 (A2-B2)(A3-C4)(C1) in ml</li> <li>Add discrete amounts of Atlas G-1086 in ml to Library 7 (A1-B4) in ml</li> <li>Add discrete amounts of Emulsogen EL 360 in ml to Library 7 (A3-A4)(B1-C3) in ml</li> </ul>                                                                                                                                            |                                                                                                                                                                                                                                                                                                                                                                                                                                                                                                                                                                                                                                                                                                                                                                                                                                                                                                                                                                                                                                                                                                           |

**Figure S2.** Ternary adjuvant systems of HTPS

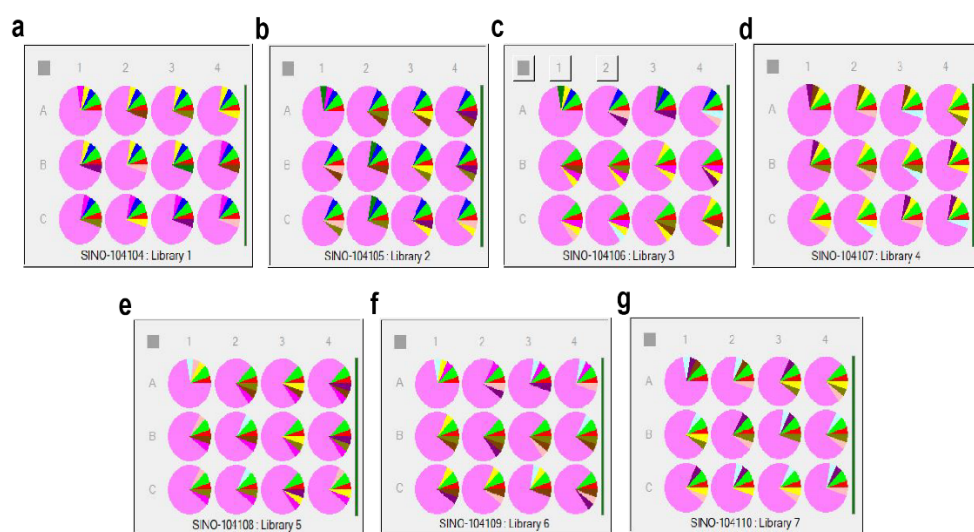

**Figure S3.** Distribution of adjuvant systems in HTTPS: (a~g) 84 ternary adjuvant systems plates.

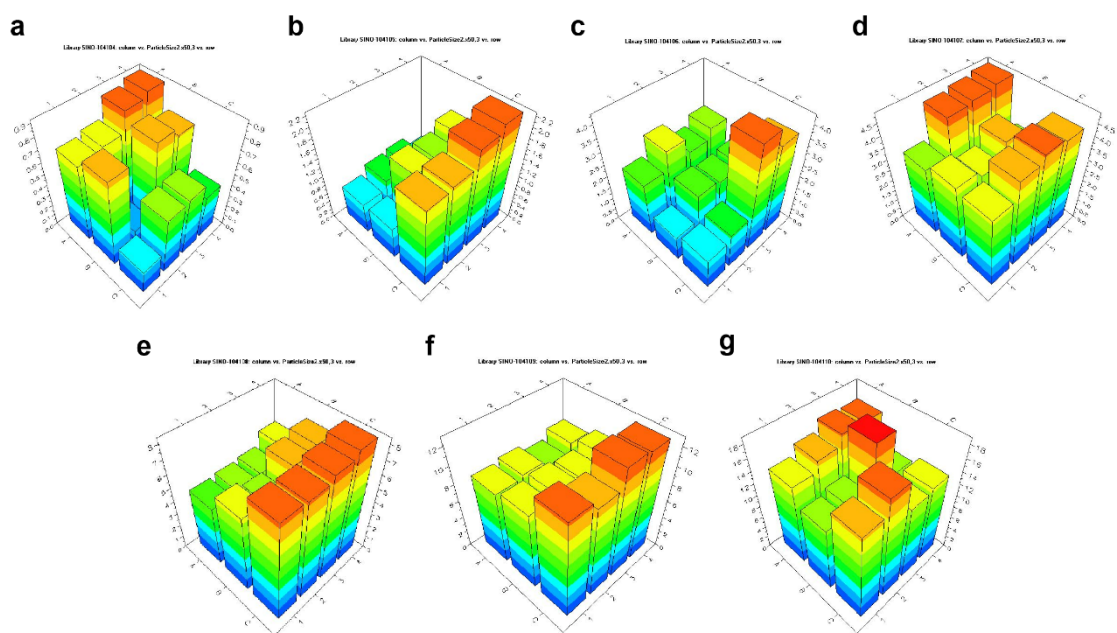

**Figure S4.** Relationship between different ternary adjuvant systems and particle size: (a) ternary library1 plate; (b) ternary library2 plate; (c) ternary library3 plate; (d) ternary library4 plate; (e) ternary library5 plate; (f) ternary library6 plate; (g) ternary library7 plate.

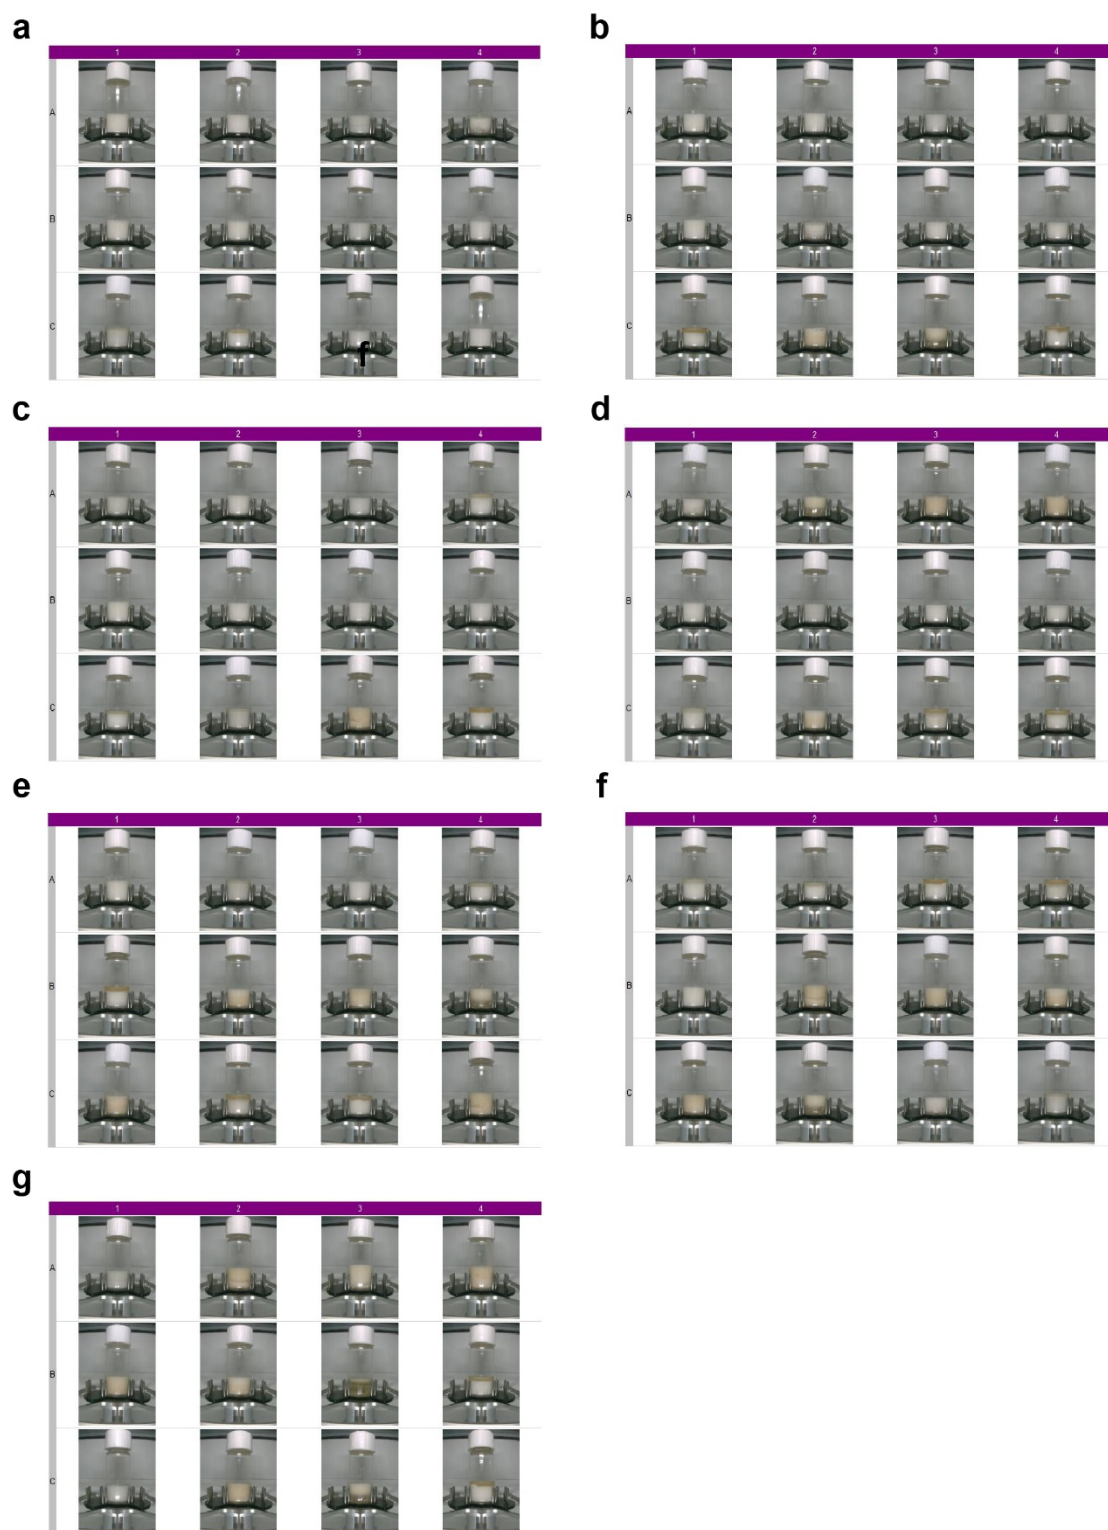

**Figure S5.** Appearance of 84 cyetpyrafen formulation samples prepared using HTPS: (a) appearance of samples from Library1-1 to Library1-12; (b) appearance of samples from Library2-1 to Library2-12; (c) appearance of samples from Library3-1 to Library3-12; (d) appearance of samples from Library4-1 to Library4-12; (e) appearance of samples from Library5-1 to Library5-12; (f) appearance of samples from Library6-1 to Library6-12; (g) appearance of samples from Library7-1 to Library7-12.

Table S1. The efficacy against the *Tetranychus cinnabarinus* of nine samples and reference sample.

| Test sample  | Particle size<br>( $\mu\text{m}$ ) | Regression equation $y=a+bx$ | LC50 (mg/L) | 95% Confidence interval |
|--------------|------------------------------------|------------------------------|-------------|-------------------------|
| Library 1-8  | 0.16                               | $7.6414+4.6719x$             | 0.2720      | 0.1663-0.3504           |
| Library 1-11 | 0.22                               | $8.0858+5.8738x$             | 0.2983      | 0.1268-0.3978           |
| Library 1-12 | 0.39                               | $8.3149+4.7872x$             | 0.2026      | 0.1554-0.2431           |
| Library 2-19 | 1.48                               | $7.4809+4.8428x$             | 0.3074      | 0.2844-0.3715           |
| Library 3-26 | 2.98                               | $6.8834+3.0926x$             | 0.3291      | 0.2872-0.4679           |
| Library 4-43 | 3.98                               | $6.6932+4.0315x$             | 0.3802      | 0.3670-0.4886           |
| Library 5-51 | 4.89                               | $5.7861+2.1163x$             | 0.4252      | 0.3935-0.5094           |
| Library 6-65 | 9.33                               | $5.5572+2.7971x$             | 0.6321      | 0.4571-0.9604           |
| Library 7-81 | 15.33                              | $5.2143+1.7394x$             | 0.7530      | 0.6304-0.9307           |
| Reference SC | 4.99                               | $5.8373+2.4073x$             | 0.4489      | 0.3935-0.5094           |

Table S2. Deposition results

|       | Fraction coverage<br>(percentage) | Droplet density<br>(per square centimeter) | Droplet rate<br>(microliters per square<br>centimeter) |
|-------|-----------------------------------|--------------------------------------------|--------------------------------------------------------|
| L1-8  | 9.12 $\pm$ 0.06a                  | 37.75 $\pm$ 0.25a                          | 0.98 $\pm$ 0.05a                                       |
| L1-12 | 6.32 $\pm$ 0.08b                  | 34.93 $\pm$ 0.50b                          | 0.73 $\pm$ 0.03b                                       |
| L2-19 | 6.00 $\pm$ 0.05bc                 | 32.79 $\pm$ 0.12b                          | 0.52 $\pm$ 0.06c                                       |
| L5-51 | 5.64 $\pm$ 0.12c                  | 30.30 $\pm$ 0.80c                          | 0.51 $\pm$ 0.03c                                       |
| L6-65 | 4.26 $\pm$ 0.09d                  | 23.90 $\pm$ 0.10d                          | 0.44 $\pm$ 0.02cd                                      |
| L7-81 | 3.25 $\pm$ 0.03e                  | 20.47 $\pm$ 0.73e                          | 0.34 $\pm$ 0.03d                                       |

The data analysis was conducted using SPSS 17.0 software. Univariate analysis of variance was employed to test for differences under the condition of a significance level of 95%.

Table S3. List of source of adjuvant

| NO. | Adjuvant | Manufacturer     | No. | Adjuvant      | Manufacturer             |
|-----|----------|------------------|-----|---------------|--------------------------|
| 1   | SK-551   | SK. AgroThink    | 49  | Lissapol PA   | Croda International Plc. |
| 2   | SK-560EP | (Shanghai) Corp. | 50  | Atlox4838B    |                          |
| 3   | SK-273F1 |                  | 51  | Atlas G5000   |                          |
| 4   | SK-5050  |                  | 52  | Cresplus DP   |                          |
| 5   | SK-33SC  |                  | 53  | Cresmer SC947 |                          |
| 6   | SK-01JK  |                  | 54  | Creslox 3484  |                          |
| 7   | SK-34SC  |                  | 55  | Creslox 3418  |                          |
| 8   | SK-20TX  |                  | 56  | Creslox 793   |                          |
| 9   | SK-92FS1 |                  | 57  | 3478N/803     |                          |
| 10  | SK-24    |                  | 58  | Atlox 3416    |                          |
| 11  | SK-21K   |                  | 59  | Creslox SC565 |                          |
| 12  | SK-24R   |                  | 60  | Creslox SC802 |                          |
| 13  | SK-25CH  |                  | 61  | Creslox SC671 |                          |

|    |               |                                             |    |                    |                                                 |
|----|---------------|---------------------------------------------|----|--------------------|-------------------------------------------------|
| 14 | YUS-FS3000    | Takemoto Oil & Fat Co., Ltd.                | 62 | Arlatone TV        | Clariant International Ltd.                     |
| 15 | YUS-WG4       |                                             | 63 | Atlas G-1086       |                                                 |
| 16 | YUS-207K      |                                             | 64 | Atlas G5000        |                                                 |
| 17 | YUS-TXC       |                                             | 65 | Atlas G5002L       |                                                 |
| 18 | YUS-RXB       |                                             | 66 | Atlox 4896         |                                                 |
| 19 | YUS-CH7000    |                                             | 67 | Atlox 4894         |                                                 |
| 20 | PICO-SC50Q    |                                             | 68 | Atlox 4894A        |                                                 |
| 21 | PICO-SC25P    |                                             | 69 | Cresmer A5         |                                                 |
| 22 | YUS-FS7PG     |                                             | 70 | Synperonic 13/5    |                                                 |
| 23 | YUS-FS1       |                                             | 71 | Synperonic91/6     |                                                 |
| 24 | YUS-SXC       |                                             | 72 | Cresmer SC157      |                                                 |
| 25 | YUS-LXC       |                                             | 73 | Phenylsulfonat CA  |                                                 |
| 26 | YUS-135B      |                                             | 74 | Phenylsulfonat CAL |                                                 |
| 27 | YUS-2011CX    |                                             | 75 | Emulsogen 3510     |                                                 |
| 28 | YUS-2010CX    |                                             | 76 | Emulsogen EL360    |                                                 |
| 29 | YUS-D625      |                                             | 77 | Emulsogen TS160    |                                                 |
| 30 | YUS-D935      |                                             | 78 | Emulsogen MP1      |                                                 |
| 31 | YUS-D3020     |                                             | 79 | SP27001            | Jiangsu SinvoChem S&T Co. Ltd.                  |
| 32 | YUS-5050PB    |                                             | 80 | SPOF3468           |                                                 |
| 33 | YUS-CP120     |                                             | 81 | SVA-116B           | Dow Chemical (Shanghai) Co., Ltd.               |
| 34 | YUS-EP70G     |                                             | 82 | OD-3310            |                                                 |
| 35 | YUS-A41B      |                                             | 83 | W600               |                                                 |
| 36 | YUS-110       |                                             | 84 | D800/D865          |                                                 |
| 37 | Greenmul 5038 | Beijing Green-times Technology Co., Ltd.    | 85 | TRITO GR-7M        | Xingtai Yancheng Chemical Auxiliaries Co., Ltd. |
| 38 | Greenmul 5800 |                                             | 86 | DOWFA 2A1          |                                                 |
| 39 | Greenmul 5810 |                                             | 87 | AEO-3              |                                                 |
| 40 | Greenmul 5816 |                                             | 88 | 300#               |                                                 |
| 41 | Greenmul 5860 |                                             | 89 | 500#               |                                                 |
| 42 | Greenmul 8500 |                                             | 90 | 600#               |                                                 |
| 43 | Greenmul 8600 |                                             | 91 | 700#               |                                                 |
| 44 | Greenmul EF81 |                                             | 92 | 1600#              |                                                 |
| 45 | Greenmul EF83 |                                             | 93 | 201                |                                                 |
| 46 | TERMUL5030    |                                             | 94 | 0201B              |                                                 |
| 47 | TERMUL200     | Indorama Ventures Mobility Trading Co.,Ltd. | 95 | 0203B              | Nanjing Jierun Sci. Tech. Co., Ltd              |
| 48 | TERMUL128x    |                                             | 96 | EthylanNS-500LQ    |                                                 |

Table S4. Unitary adjuvant systems (Library 1 plate)

| 1 | 2 | 3 | 4 | 5 | 6 |
|---|---|---|---|---|---|
|---|---|---|---|---|---|



|   |                   |            |            |                |         |         |
|---|-------------------|------------|------------|----------------|---------|---------|
| A | SK-551            | SK-5050    | SK-01JK    | <b>SK-20TX</b> | SK-24   | SK-24R  |
| B | <b>SK-560EP</b>   | SK-33SC    | SK-34SC    | SK-92FS1       | SK-21K  | SK-25CH |
| C | SK-273F1          | YUS-FS3000 | YUS-WG4    | YUS-207K       | YUS-TXC | YUS-RXB |
| D | <b>YUS-CH7000</b> | PICO-SC50Q | PICO-SC25P | YUS-FS7PG      | YUS-FS1 | YUS-SXC |

Table S5. Unitary adjuvant systems (Library 2 plate)

|   | 1                    | 2             | 3                   | 4               | 5              | 6             |
|---|----------------------|---------------|---------------------|-----------------|----------------|---------------|
| A | YUS-LXC              | TERMUL5030    | TERMUL200           | TERMUL128x      | Greenmul 5038  | Greenmul 5800 |
| B | <b>Greenmul 5810</b> | Greenmul 5816 | Greenmul 5860       | Greenmul 8500   | Greenmul 8600  | Greenmul EF81 |
| C | Greenmul EF83        | Arlatone TV   | <b>Atlas G-1086</b> | Atlas G5000     | Atlas G5002L   | Atlox 4896    |
| D | Atlox 4894           | Atlox 4894A   | Cresmer A5          | Synperonic 13/5 | Synperonic91/6 | Cresmer SC157 |

Table S6. Unitary adjuvant systems (Library 3 plate)

|   | 1            | 2           | 3           | 4             | 5                     | 6                  |
|---|--------------|-------------|-------------|---------------|-----------------------|--------------------|
| A | Lissapol PA  | Atlox4838B  | Atlas G5000 | Cresplus DP   | Cresmer SC947         | Creslox 3484       |
| B | Creslox 3418 | Creslox 793 | 3478N/803   | Atlox 3416    | YUS-135B              | YUS-2011CX         |
| C | YUS-2010CX   | YUS-D625    | YUS-D935    | YUS-D3020     | YUS-5050PB            | YUS-CP120          |
| D | YUS-EP70G    | YUS-A41B    | YUS-110     | Ethylan 500LQ | NS- Phenylsulfonat CA | Phenylsulfonat CAL |

Table S7. Unitary adjuvant systems (Library 4 plate)

|   | 1              | 2                      | 3               | 4             | 5             | 6         |
|---|----------------|------------------------|-----------------|---------------|---------------|-----------|
| A | Emulsogen 3510 | <b>Emulsogen EL360</b> | Emulsogen TS160 | Emulsogen MP1 | SPOF3468      | SVA-116B  |
| B | <b>AEO-3</b>   | OD-3310                | W600            | D800/D865     | TRITO GR-7M   | DOWFA 2A1 |
| C | 300#           | <b>500#</b>            | <b>600#</b>     | 700#          | 1600#         | 0201      |
| D | 0201B          | 0203B                  | Creslox SC565   | Creslox SC802 | Creslox SC671 | SP27001   |

Table S8. Ternary adjuvant systems (Library 1 plate)

|          | 1          | 2               | 3            | 4               |
|----------|------------|-----------------|--------------|-----------------|
|          | SK-20TX    | SK-20TX         | SK-20TX      | SK-20TX         |
| <b>A</b> | SK-560EP   | SK-560EP        | SK-560EP     | SK-560EP        |
|          | YUS-CH7000 | Greenmul 5810   | Atlas G-1086 | Emulsogen EL360 |
|          | SK-20TX    | <b>SK-20TX</b>  | SK-20TX      | SK-20TX         |
| <b>B</b> | SK-560EP   | <b>SK-560EP</b> | SK-560EP     | YUS-CH7000      |
|          | AEO-3      | <b>500#</b>     | 600#         | Greenmul 5810   |

|          |              |                 |                   |                   |
|----------|--------------|-----------------|-------------------|-------------------|
|          | SK-20TX      | SK-20TX         | <b>SK-20TX</b>    | <b>SK-20TX</b>    |
| <b>C</b> | YUS-CH7000   | YUS-CH7000      | <b>YUS-CH7000</b> | <b>YUS-CH7000</b> |
|          | Atlas G-1086 | Emulsogen EL360 | <b>AEO-3</b>      | <b>500#</b>       |

Table S9. Ternary adjuvant systems (Library 2 plate)

|          | 1             | 2                   | 3                      | 4                    |
|----------|---------------|---------------------|------------------------|----------------------|
|          | SK-20TX       | SK-20TX             | <b>SK-20TX</b>         | <b>SK-20TX</b>       |
| <b>A</b> | YUS-CH7000    | Greenmul 5810       | <b>Greenmul 5810</b>   | <b>Greenmul 5810</b> |
|          | 600#          | Atlas G-1086        | <b>Emulsogen EL360</b> | <b>AEO-3</b>         |
|          | SK-20TX       | SK-20TX             | SK-20TX                | SK-20TX              |
| <b>B</b> | Greenmul 5810 | Greenmul 5810       | Atlas G-1086           | Atlas G-1086         |
|          | 500#          | 600#                | Emulsogen EL360        | AEO-3                |
|          | SK-20TX       | <b>SK-20TX</b>      | SK-20TX                | SK-20TX              |
| <b>C</b> | Atlas G-1086  | <b>Atlas G-1086</b> | Emulsogen EL360        | Emulsogen EL360      |
|          | 500#          | <b>600#</b>         | AEO-3                  | 500#                 |

Table S10. Ternary adjuvant systems (Library 3 plate)

|          | 1               | 2                   | 3               | 4               |
|----------|-----------------|---------------------|-----------------|-----------------|
|          | SK-20TX         | <b>SK-20TX</b>      | SK-20TX         | SK-20TX         |
| <b>A</b> | Emulsogen EL360 | <b>AEO-3</b>        | AEO-3           | 500#            |
|          | 600#            | <b>500#</b>         | 600#            | 600#            |
|          | SK-560EP        | <b>SK-560EP</b>     | SK-560EP        | SK-560EP        |
| <b>B</b> | YUS-CH7000      | <b>YUS-CH7000</b>   | YUS-CH7000      | YUS-CH7000      |
|          | Greenmul 5810   | <b>Atlas G-1086</b> | Emulsogen EL360 | AEO-3           |
|          | SK-560EP        | SK-560EP            | SK-560EP        | SK-560EP        |
| <b>C</b> | YUS-CH7000      | YUS-CH7000          | Greenmul 5810   | Greenmul 5810   |
|          | 500#            | 600#                | Atlas G-1086    | Emulsogen EL360 |

Table S11. Ternary adjuvant systems (Library 4 plate)

|          | 1               | 2               | 3                   | 4                      |
|----------|-----------------|-----------------|---------------------|------------------------|
|          | SK-560EP        | SK-560EP        | SK-560EP            | SK-560EP               |
| <b>A</b> | Greenmul 5810   | Greenmul 5810   | Greenmul 5810       | Atlas G-1086           |
|          | AEO-3           | 500#            | 600#                | Emulsogen EL360        |
|          | SK-560EP        | SK-560EP        | <b>SK-560EP</b>     | <b>SK-560EP</b>        |
| <b>B</b> | Atlas G-1086    | Atlas G-1086    | <b>Atlas G-1086</b> | <b>Emulsogen EL360</b> |
|          | AEO-3           | 500#            | <b>600#</b>         | <b>AEO-3</b>           |
|          | SK-560EP        | SK-560EP        | SK-560EP            | SK-560EP               |
| <b>C</b> | Emulsogen EL360 | Emulsogen EL360 | AEO-3               | AEO-3                  |
|          | 500#            | 600#            | 500#                | 600#                   |

Table S12. Ternary adjuvant systems (Library 5 plate)

|          | 1        | 2          | 3                 | 4          |
|----------|----------|------------|-------------------|------------|
| <b>A</b> | SK-560EP | YUS-CH7000 | <b>YUS-CH7000</b> | YUS-CH7000 |

|          |               |               |                        |                 |
|----------|---------------|---------------|------------------------|-----------------|
|          | 500#          | Greenmul 5810 | <b>Greenmul 5810</b>   | Greenmul 5810   |
|          | 600#          | Atlas G-1086  | <b>Emulsogen EL360</b> | AEO-3           |
|          | YUS-CH7000    | YUS-CH7000    | YUS-CH7000             | YUS-CH7000      |
| <b>B</b> | Greenmul 5810 | Greenmul 5810 | Atlas G-1086           | Atlas G-1086    |
|          | 500#          | 600#          | Emulsogen EL360        | AEO-3           |
|          | YUS-CH7000    | YUS-CH7000    | YUS-CH7000             | YUS-CH7000      |
| <b>C</b> | Atlas G-1086  | Atlas G-1086  | Emulsogen EL360        | Emulsogen EL360 |
|          | 500#          | 600#          | AEO-3                  | 500#            |

Table S13. Ternary adjuvant systems (Library 6 plate)

|          | 1               | 2                    | 3               | 4                    |
|----------|-----------------|----------------------|-----------------|----------------------|
|          | YUS-CH7000      | YUS-CH7000           | YUS-CH7000      | YUS-CH7000           |
| <b>A</b> | Emulsogen EL360 | AEO-3                | AEO-3           | 500#                 |
|          | 600#            | 500#                 | 600#            | 600#                 |
|          | Greenmul 5810   | <b>Greenmul 5810</b> | Greenmul 5810   | Greenmul 5810        |
| <b>B</b> | Atlas G-1086    | <b>Atlas G-1086</b>  | Atlas G-1086    | Atlas G-1086         |
|          | Emulsogen EL360 | <b>AEO-3</b>         | 500#            | 600#                 |
|          | Greenmul 5810   | Greenmul 5810        | Greenmul 5810   | <b>Greenmul 5810</b> |
| <b>C</b> | Emulsogen EL360 | Emulsogen EL360      | Emulsogen EL360 | <b>AEO-3</b>         |
|          | AEO-3           | 500#                 | 600#            | <b>500#</b>          |

Table S14. Ternary adjuvant systems (Library 7 plate)

|          | 1                      | 2               | 3               | 4               |
|----------|------------------------|-----------------|-----------------|-----------------|
|          | Greenmul 5810          | Greenmul 5810   | Atlas G-1086    | Atlas G-1086    |
| <b>A</b> | AEO-3                  | 500#            | Emulsogen EL360 | Emulsogen EL360 |
|          | 600#                   | 600#            | AEO-3           | 500#            |
|          | Atlas G-1086           | Atlas G-1086    | Atlas G-1086    | Atlas G-1086    |
| <b>B</b> | Emulsogen EL360        | AEO-3           | AEO-3           | 500#            |
|          | 600#                   | 500#            | 600#            | 600#            |
|          | <b>Emulsogen EL360</b> | Emulsogen EL360 | Emulsogen EL360 | AEO-3           |
| <b>C</b> | <b>AEO-3</b>           | AEO-3           | 500#            | 500#            |
|          | <b>500#</b>            | 600#            | 600#            | 600#            |
